# Supplementary material
Source: HighWire-hosted journal article supplement (https://www.annals.org/content/suppl/2006/05/30/144.10.742)
Supplement: Chaudhry_AT1_144-10-742-DC1-1.pdf [file Chaudhry_AT1_144-10-742-DC1-1.pdf]

Appendix Table 1. Benchmark Leaders in Health Information Technology Research\*

| Study, Year (Reference),<br>Type of Study<br>(n = 54) | Institution           | Data<br>Collection | Primary HIT<br>Intervention | Setting    | Purpose (To Determine the<br>Effect of . . .)                                                                                           | Dimensions<br>of Care End<br>Points | Effect<br>Evaluated        | Key Finding                                                                                                                                                                                                                                                                                                                                                                                                                                                                                                                                                                                     |
|-------------------------------------------------------|-----------------------|--------------------|-----------------------------|------------|-----------------------------------------------------------------------------------------------------------------------------------------|-------------------------------------|----------------------------|-------------------------------------------------------------------------------------------------------------------------------------------------------------------------------------------------------------------------------------------------------------------------------------------------------------------------------------------------------------------------------------------------------------------------------------------------------------------------------------------------------------------------------------------------------------------------------------------------|
| <b>Quality adherence<br/>(n = 20)</b>                 |                       |                    |                             |            |                                                                                                                                         |                                     |                            |                                                                                                                                                                                                                                                                                                                                                                                                                                                                                                                                                                                                 |
| Dexter et al.,<br>2004 (18), RCT                      | Regenstrief Institute | 1998–1999          | DS/EHR                      | Inpatient  | Computer-based standing<br>orders vs. computerized<br>physician reminders                                                               | Effectiveness                       | Adherence/<br>surveillance | 12–percentage point absolute increase (from 30% to 42%) in influenza vaccinations and 20–percentage point absolute increase (from 31% to 51%) in pneumococcal vaccinations in the standing-orders group; computer identified 50% and 22% of hospitalized patients as eligible for influenza and pneumococcal vaccinations, respectively; 19% and 7% of patients screened by computer as eligible for influenza and pneumococcal vaccines stated that they had previously been vaccinated and did not require another vaccination (data from outside facilities not present in evaluated system) |
| Dexter et al.,<br>1998 (19), RCT                      | Regenstrief Institute | NS                 | DS/EHR                      | Outpatient | Computer-generated,<br>paper-based reminders on<br>planning for end-of-life<br>care vs. usual care (no<br>reminder)                     | Effectiveness                       | Adherence                  | 20–percentage point absolute increase (from 4% to 24%) in physicians who discussed advance directives; 11–percentage point absolute increase (from 4% to 15%) in physicians caring for patients who completed advanced care plans                                                                                                                                                                                                                                                                                                                                                               |
| Overhage et al.,<br>1997 (20), RCT                    | Regenstrief Institute | 1992–1993          | DS/CPOE                     | Inpatient  | Point-of-care computerized<br>reminders on adherence<br>to guideline-based care vs.<br>usual care (CPOE without<br>evaluated reminders) | Effectiveness/<br>efficiency        | Adherence                  | 24–percentage point absolute increase (from 22% to 46%) in adherence to guidelines; adherence increased for immediate, 24-h, and total hospital stays; little increase between immediate and 24-h adherence; 33% relative decrease (from 156 to 105) in number of pharmacist interventions; no statistically significant difference in costs or length of stay                                                                                                                                                                                                                                  |

Continued on following page

Appendix Table 1—Continued

| Study, Year (Reference), Type of Study (n = 54) | Institution           | Data Collection | Primary HIT Intervention | Setting    | Purpose (To Determine the Effect of . . .)                                                                                                                                                         | Dimensions of Care End Points | Effect Evaluated | Key Finding                                                                                                                                                                                                                                                                                                                                                                                                                                                                                                                                                                                                           |
|-------------------------------------------------|-----------------------|-----------------|--------------------------|------------|----------------------------------------------------------------------------------------------------------------------------------------------------------------------------------------------------|-------------------------------|------------------|-----------------------------------------------------------------------------------------------------------------------------------------------------------------------------------------------------------------------------------------------------------------------------------------------------------------------------------------------------------------------------------------------------------------------------------------------------------------------------------------------------------------------------------------------------------------------------------------------------------------------|
| Overhage et al., 1996 (21), RCT                 | Regenstrief Institute | 1992–1993       | DS/EHR                   | Inpatient  | Computer-generated reminders on use of preventive care services vs. usual care                                                                                                                     | Effectiveness                 | Adherence        | No statistically significant effect demonstrated; high adherence to reminders was anticipated but not demonstrated, and no mechanism to capture reasons for nonadherence was incorporated                                                                                                                                                                                                                                                                                                                                                                                                                             |
| Litzelman et al., 1993 (22), RCT                | Regenstrief Institute | 1989            | DS/EHR                   | Outpatient | Computerized reminders of preventive care; comparison was between requiring physicians to acknowledge the reminder vs. using reminder alone                                                        | Effectiveness                 | Adherence        | In group requiring acknowledgment, 12–percentage point absolute increase (from 49% to 61%) in fecal occult blood testing and 7–percentage point absolute increase (from 47% to 54%) in mammography; no statistically significant improvement in Papanicolaou screening                                                                                                                                                                                                                                                                                                                                                |
| McDonald et al., 1992 (23), RCT                 | Regenstrief Institute | 1978–1981       | DS                       | Outpatient | Computer-generated, paper-based reminders on need for influenza vaccination vs. no computer-based reminders                                                                                        | Effectiveness                 | Adherence        | 12%–18% absolute increase (15.6%–29.5% in year 3) in influenza vaccination rates                                                                                                                                                                                                                                                                                                                                                                                                                                                                                                                                      |
| Tierney et al. (24), 1986, RCT                  | Regenstrief Institute | 1983–1984       | DS/data summary/EHR      | Outpatient | Three interventions on preventive health: 1) computer-generated, paper-based reminders provided each visit; 2) computer-generated, paper-based care summaries generated monthly; and 3) usual care | Effectiveness                 | Adherence        | Approximate absolute effects of computerized reminders: 33–percentage point absolute increase (from 25% to 58%) in fecal occult blood testing, 33–percentage point absolute increase (from 5% to 38%) in pneumococcal vaccination, 16–percentage point absolute increase (8% to 24%) in screening mammography, and 12–percentage point absolute increase (from 12% to 24%) in metronidazole for trichomonas infections; 9 other preventive care processes evaluated showed no statistically or clinically significant improvement with reminders; effects of reminders were greater than those of the summary reports |
| McDonald et al., 1984 (25), CCT                 | Regenstrief Institute | 1978–1980       | DS/EHR                   | Outpatient | Computer-generated, paper-based reminders on adherence to protocol-based care vs. usual care (no reminders)                                                                                        | Effectiveness/efficiency      | Adherence        | 15%–20% increase in adherence to protocol-based care; greatest increases seen in preventive care (relative increase in utilization, 200%–400%); information other than laboratory and pharmacy data entered by research assistants; computer system did not capture all patient data                                                                                                                                                                                                                                                                                                                                  |

Continued on following page

Appendix Table 1—Continued

| Study, Year (Reference), Type of Study (n = 54) | Institution           | Data Collection | Primary HIT Intervention | Setting    | Purpose (To Determine the Effect of . . .)                                                                                                     | Dimensions of Care End Points   | Effect Evaluated            | Key Finding                                                                                                                                                                                                                                                                                                                                                                                                                                                                               |
|-------------------------------------------------|-----------------------|-----------------|--------------------------|------------|------------------------------------------------------------------------------------------------------------------------------------------------|---------------------------------|-----------------------------|-------------------------------------------------------------------------------------------------------------------------------------------------------------------------------------------------------------------------------------------------------------------------------------------------------------------------------------------------------------------------------------------------------------------------------------------------------------------------------------------|
| McDonald et al., 1980 (26), CCT                 | Regenstrief Institute | NS              | DS/EHR                   | Outpatient | Computer-generated, paper-based reminders with and without literature citations on adherence to protocol-based care vs. usual care             | Effectiveness                   | Adherence/medical errors    | 19–percentage point absolute increase (from 19.8% to 38.4%) in adherence to protocol-based care; minimal learning effects were seen when the computerized reminders were turned off                                                                                                                                                                                                                                                                                                       |
| McDonald, 1976 (27), RCT                        | Regenstrief Institute | NS              | DS/EHR                   | Outpatient | Computer-generated, paper-based reminders on adherence to protocol-based care for diabetes                                                     | Effectiveness/safety/efficiency | Adherence/medication errors | 15–percentage point increase (from 11% to 36% and from 13% to 28%) in adherence to protocols; computer systems could not capture all laboratory data kept in paper chart; physicians agreed with a maximum of 57% of computer recommendations; most reminders related to medication care; cost \$2/visit to maintain computer record                                                                                                                                                      |
| McDonald, 1976 (28), RCT                        | Regenstrief Institute | 1975            | DS/EHR                   | Outpatient | Computer-generated, paper-based reminders on adherence to protocol-based care                                                                  | Effectiveness/safety            | Adherence/medication errors | 29–percentage point absolute increase (from 22% to 51%) in adherence to protocols; computer system could not capture all laboratory data kept in paper chart; most reminders related to medication-based care                                                                                                                                                                                                                                                                             |
| Kucher et al., 2005 (29), CCT                   | Partners Health Care  | 2000–2004       | DS/CPOE                  | Inpatient  | Computerized alerts for anticoagulation prophylaxis vs. usual care for prevention of venous thromboembolism in high-risk hospitalized patients | Effectiveness                   | Adherence/surveillance      | 3.3–percentage point absolute decrease (from 8.2% to 4.9%) in the combined primary end point of deep venous thrombosis or pulmonary embolism within 90 d after hospitalization; 19–percentage point absolute increase (from 33.5% to 14.5%) in use of anticoagulation prophylaxis; as part of intervention, a computer-based risk assessment program was used to screen and identify inpatients at high risk for venous thromboembolism; 80% of patients enrolled had some type of cancer |
| Abookire et al., 2000 (30), time-series study   | Partners Health Care  | 1995–1999       | DS/CPOE                  | Inpatient  | Trends in alerts and physician response to alerts                                                                                              | Safety/effectiveness            | Adherence                   | 24–percentage point absolute reduction (from 51% to 27%) in adherence to “definite” medication allergy alerts and 26–percentage point absolute reduction in adherence (from 46% to 20%) to “possible” allergy alerts over 4 y; adherence decreased as number of alerts increased                                                                                                                                                                                                          |

Continued on following page

Appendix Table 1—Continued

| Study, Year (Reference), Type of Study (n = 54) | Institution                                       | Data Collection | Primary HIT Intervention | Setting    | Purpose (To Determine the Effect of . . .)                                                                                           | Dimensions of Care End Points | Effect Evaluated | Key Finding                                                                                                                                                                                                                                                                                                                                                                                                                                                                                                                                                             |
|-------------------------------------------------|---------------------------------------------------|-----------------|--------------------------|------------|--------------------------------------------------------------------------------------------------------------------------------------|-------------------------------|------------------|-------------------------------------------------------------------------------------------------------------------------------------------------------------------------------------------------------------------------------------------------------------------------------------------------------------------------------------------------------------------------------------------------------------------------------------------------------------------------------------------------------------------------------------------------------------------------|
| Teich et al., 2000 (31), pre–post study         | Brigham and Women’s Hospital/Partners Health Care | 1993            | CPOE/DS                  | Inpatient  | CPOE on physician prescribing practices and adherence to medication formularies                                                      | Effectiveness/safety          | Adherence        | 66–percentage point absolute increase (from 15.6% to 81.3%) in formulary adherence for gastric H <sub>2</sub> -blockers; 23–percentage point absolute increase (from 24% to 47%) in appropriate use of subcutaneous heparin prophylaxis; 1.5–percentage point absolute decrease (from 2.1% to 0.6%) in number of medication doses written that exceeded maximum recommended (“possibly because of increased use of order sets”); effects persisted at 1- and 2-y follow-up; cost savings from H <sub>2</sub> -blocker, \$250 000; costs to maintain system, \$700 000/y |
| Cannon and Allen 2000 (32), RCT                 | VA                                                | 1998            | DS/EHR                   | Outpatient | Guideline-based computerized vs. manual paper-based reminders on screening rates for mood disorders                                  | Effectiveness                 | Adherence        | 25.5–percentage point absolute increase (from 61% to 86.5%) in physician screening for mood disorders with computerized system                                                                                                                                                                                                                                                                                                                                                                                                                                          |
| Demakis et al., 2000 (33), RCT                  | VA                                                | 1995–1996       | DS/EHR                   | Outpatient | Computerized reminders on physician adherence to ambulatory care recommendations vs. usual care (EHR without hypertension reminders) | Effectiveness                 | Adherence        | 5.3–percentage point absolute increase (from 53.5% to 58.8%) in adherence to recommended care; 5 of 13 examined care processes improved; effect of reminders decreased over time                                                                                                                                                                                                                                                                                                                                                                                        |
| Rossi and Every, 1997 (34), RCT                 | VA                                                | 1996            | DS                       | Outpatient | Computer-generated, paper-based reminders on adherence to appropriate care for hypertension treatment vs. usual care (no reminders)  | Effectiveness                 | Adherence        | 11.3–percentage point absolute increase (from <1% to 11.3%) in appropriate hypertension treatment                                                                                                                                                                                                                                                                                                                                                                                                                                                                       |
| Willson et al., 1995 (35), pre–post study       | LDS Hospital/ Intermountain Health Care           | 1994–NS         | DS                       | Inpatient  | Computerized guidelines for prevention and treatment of pressure ulcers                                                              | Effectiveness                 | Adherence        | 5–percentage point absolute decrease (from 7% to 2%) in ulcer development                                                                                                                                                                                                                                                                                                                                                                                                                                                                                               |

Continued on following page

Appendix Table 1—Continued

| Study, Year (Reference), Type of Study (n = 54) | Institution                                       | Data Collection | Primary HIT Intervention     | Setting    | Purpose (To Determine the Effect of . . .)                                                                                   | Dimensions of Care End Points | Effect Evaluated | Key Finding                                                                                                                                                                                                                                                                                                                                                                                                                                                                                                                                                                                                                              |
|-------------------------------------------------|---------------------------------------------------|-----------------|------------------------------|------------|------------------------------------------------------------------------------------------------------------------------------|-------------------------------|------------------|------------------------------------------------------------------------------------------------------------------------------------------------------------------------------------------------------------------------------------------------------------------------------------------------------------------------------------------------------------------------------------------------------------------------------------------------------------------------------------------------------------------------------------------------------------------------------------------------------------------------------------------|
| Evans et al., 1994 (36), RCT                    | LDS Hospital/ Intermountain Health Care           | 1990            | DS/EHR                       | Inpatient  | Computerized guidelines on appropriateness of antibiotic use                                                                 | Effectiveness                 | Adherence        | Computer program suggested correct antibiotic in 94% of cases; 17–percentage point absolute increase (from 77% to 94%) in coverage of identified organism; 27% relative decrease (from 22 to 16 h) in time to appropriate treatment after culture results; 21% relative decrease (from \$51.93 to \$41.08) in antibiotic cost; physicians ordered appropriate antibiotics within 12 h of culture collection significantly more often with use of program compared with usual care; 88% of physicians would recommend the program to other physicians, 85% said the program improved antibiotic selection, and 81% said use improved care |
| Larsen et al., 1989 (37), pre–post study        | LDS Hospital/ Intermountain Health Care           | 1985–1986       | DS                           | Inpatient  | Computerized reminders on appropriateness of preoperative antibiotics and on rates of postoperative wound infections         | Effectiveness                 | Adherence        | 0.4–percentage point absolute decrease (from 1.1% to 0.7%) in total postoperative wound infections; 0.9–percentage point absolute decrease (from 1.8% to 0.9%) in wound infections among patients with general indication for antibiotic prophylaxis; 18–percentage point increase (from 40% to 58%) in appropriateness of antibiotic timing                                                                                                                                                                                                                                                                                             |
| <b>Surveillance (n = 10)</b>                    |                                                   |                 |                              |            |                                                                                                                              |                               |                  |                                                                                                                                                                                                                                                                                                                                                                                                                                                                                                                                                                                                                                          |
| Overhage et al., 2001 (38), case–control study  | Regenstrief Institute                             | 2000–2001       | Electronic results reporting | Outpatient | Electronic laboratory reporting on public health surveillance                                                                | Access/ effectiveness         | Surveillance     | 29–percentage point increase (from 71% to 100%) in identified cases during a shigellosis outbreak; 2.5-d decrease in reporting time                                                                                                                                                                                                                                                                                                                                                                                                                                                                                                      |
| Honigman et al., 2001 (39), cohort study        | Brigham and Women's Hospital/Partners Health Care | 1995–1996       | EHR                          | Outpatient | Computer program to retrospectively detect ADEs vs. chart review                                                             | Safety                        | Surveillance     | Sensitivity for ADEs, 58%; specificity, 88%; ADE rate was 5.5/100 patients; 9% of outpatient ADEs required hospitalization                                                                                                                                                                                                                                                                                                                                                                                                                                                                                                               |
| Jha et al., 1998 (40), case series              | Brigham and Women's Hospital/Partners Health Care | 1995            | Data summary/ CPOE           | Inpatient  | Three interventions for identifying adverse drug events: 1) computer monitoring, 2) chart review, and 3) voluntary reporting | Safety                        | Surveillance     | Computerized monitoring identified 45% of ADEs; chart review identified 65%; voluntary reporting identified 4%; computer was better for ADEs related to quantitative changes (e.g., laboratory values) and chart review was better for ADEs related only to symptoms; voluntary reporting was better for potential ADEs that had not yet occurred                                                                                                                                                                                                                                                                                        |

Continued on following page

**Appendix Table 1—Continued**

| Study, Year (Reference), Type of Study (n = 54) | Institution                             | Data Collection | Primary HIT Intervention       | Setting    | Purpose (To Determine the Effect of . . .)                                                                                                         | Dimensions of Care End Points | Effect Evaluated                | Key Finding                                                                                                                                                                                                                                                                                                                                                                                                                                                                                             |
|-------------------------------------------------|-----------------------------------------|-----------------|--------------------------------|------------|----------------------------------------------------------------------------------------------------------------------------------------------------|-------------------------------|---------------------------------|---------------------------------------------------------------------------------------------------------------------------------------------------------------------------------------------------------------------------------------------------------------------------------------------------------------------------------------------------------------------------------------------------------------------------------------------------------------------------------------------------------|
| Kramer et al., 2003 (41), case series           | VA                                      | 1999–2000       | Electronic data collection/EHR | Outpatient | Automated data collection algorithms vs. manual review of EHRs by trained abstracters on diagnosing new cases of depression                        | Effectiveness                 | Surveillance                    | High false-positive rate for diagnosis via automated algorithms; quality indicator scores based solely on automated data show agreement with manual review, but results may show some bias                                                                                                                                                                                                                                                                                                              |
| Kerr et al., 2002 (42), case series             | VA                                      | 1999–2000       | Electronic data collection/EHR | Mixed      | Automated queries of computerized disease registries vs. manual chart abstraction (mixed EHR and paper chart sources) on measuring quality of care | Effectiveness                 | Surveillance                    | Automated queries from disease registries underestimated rates of completion for quality-of-care process indicators; no differences were noted for intermediate outcome measures; automated queries were less labor-intensive                                                                                                                                                                                                                                                                           |
| Classen et al., 1997 (43), case-control study   | LDS Hospital/ Intermountain Health Care | 1990–1993       | Data summary/ DS/EHR           | Inpatient  | Computer surveillance to identify ADEs and associated costs                                                                                        | Efficiency                    | Surveillance                    | Computer system was used to screen 91 574 admissions for ADEs; 2.43 ADEs/100 admissions; 2.45–absolute percentage point increase (from 1.05% to 3.5%) in crude mortality associated with ADEs; 1.9-d increase in attributable length of stay and associated \$2262 increase in costs                                                                                                                                                                                                                    |
| Evans et al., 1992 (44), case-control study     | LDS Hospital/ Intermountain Health Care | 1989–1992       | Data summary/EHR               | Inpatient  | Computerized surveillance vs. manual reporting on identifying and preventing ADEs                                                                  | Safety                        | Surveillance                    | 2.36–percentage point absolute increase (from 0.04% to 2.4%) in identified ADEs; alerting system implemented in year 2 in which pharmacists received surveillance reports and contacted physicians; severe ADEs decreased 5.4 percentage points (from 7.6% to 2.2%); ADEs due to allergies decreased 13.6 percentage points (from 15% to 1.4%); analysis of ADE database allowed authors to design reduction initiatives that decreased significant ADEs from 56 events in year 1 to 8 events in year 3 |
| Evans et al., 1993 (45), case-control           | LDS Hospital/ Intermountain Health Care | 1990–1992       | Data summary/ DS/EHR           | Inpatient  | Computerized surveillance on determining attributable effect of ADEs on hospital length of stay and costs                                          | Safety/ efficiency            | Surveillance/ medication errors | Computer system was used to screen the records of 60 836 inpatients; 1348 ADEs were identified in 1209 patients; those with ADEs were matched to a total of 10 542 control patients; ADEs were associated with an attributable increase in length of stay of 1.9 d and increase in attributable costs of \$1939                                                                                                                                                                                         |

*Continued on following page*

Appendix Table 1—Continued

| Study, Year (Reference), Type of Study (n = 54) | Institution                                       | Data Collection | Primary HIT Intervention | Setting   | Purpose (To Determine the Effect of . . .)                                                                                                      | Dimensions of Care End Points | Effect Evaluated                | Key Finding                                                                                                                                                                                                                                                                                                                                                                                                                                                                                                                                                                                                                                                                                                                  |
|-------------------------------------------------|---------------------------------------------------|-----------------|--------------------------|-----------|-------------------------------------------------------------------------------------------------------------------------------------------------|-------------------------------|---------------------------------|------------------------------------------------------------------------------------------------------------------------------------------------------------------------------------------------------------------------------------------------------------------------------------------------------------------------------------------------------------------------------------------------------------------------------------------------------------------------------------------------------------------------------------------------------------------------------------------------------------------------------------------------------------------------------------------------------------------------------|
| Classen et al., 1991 (70), case series          | LDS Hospital/ Intermountain Health Care           | 1989–1990       | DS/EHR                   | Inpatient | Computer surveillance vs. usual care (paper-based ADE reporting) to determine rates of ADEs                                                     | Safety                        | Surveillance/ medication errors | 36 653 patients were monitored for ADEs over 18 mo; 731 ADEs were detected in 648 patients by using the computer system while over the same period only 9 ADEs were detected with the standard paper-based incident reports; 641 ADEs were detected through computer algorithms and other automated methods, and 90 were detected through the voluntary computer-based reporting system; 101 ADEs were severe and 600 were moderate; 52 hospital admissions were due to ADEs; computer-based ADE surveillance was done daily Monday through Friday and took on average “two hours a day”; in 75% of verified ADE cases, the medication was withdrawn only when study personnel alerted physicians to the presence of the ADE |
| Evans et al., 1986 (46), cohort study           | LDS Hospital/ Intermountain Health Care           | 1984            | Data summary/ EHR        | Inpatient | Computer vs. manual surveillance for assessing rates of hospital-acquired infections and associated antibiotic use                              | Safety                        | Surveillance                    | 14–percentage point absolute increase (from 76% to 90%) in identification of infections; 65% decrease (from 130 to 46 h) in time required for surveillance; 4–percentage point absolute increase (from 19% to 23%) in false-positive rates with the computer; computer screening identified patients receiving antibiotics to which infections were resistant, antibiotics with less expensive alternatives, and patients receiving prophylactic antibiotics for longer than necessary                                                                                                                                                                                                                                       |
| <b>Medication errors (n = 7)</b>                |                                                   |                 |                          |           |                                                                                                                                                 |                               |                                 |                                                                                                                                                                                                                                                                                                                                                                                                                                                                                                                                                                                                                                                                                                                              |
| Chertow et al., 2001 (47), CCT                  | Brigham and Women’s Hospital/Partners Health Care | 1997–1998       | DS/CPOE                  | Inpatient | Computerized drug dosing algorithm to determine effect on medication prescribing in renal insufficiency vs. usual care (CPOE without algorithm) | Efficiency/ effectiveness     | Medication errors/ adherence    | 21–percentage point absolute increase (from 30% to 51%) in appropriate medication orders (dosing levels or dosing frequency); 4.5% reduction (from 4.5 to 4.3 d) in length of stay; no statistically significant decrease in costs                                                                                                                                                                                                                                                                                                                                                                                                                                                                                           |
| Bates et al., 1999 (48), time-series study      | Brigham and Women’s Hospital/Partners Health Care | 1992–1997       | CPOE/DS                  | Inpatient | CPOE with enhanced DS on rates of nonmissed dose errors and overall noninterrupted serious medication error rates                               | Safety                        | Medication errors               | 86% relative reduction (from 7.6 events/1000 patient-days to 1.1 events/1000 patient-days) in nonintercepted serious medication errors; 82% relative reduction (from 142 events/1000 patient-days to 26.6 events/1000 patient-days) in nonmissed dose errors; reductions seen for all error types; level of DS in system increased over time                                                                                                                                                                                                                                                                                                                                                                                 |

Continued on following page

Appendix Table 1—Continued

| Study, Year (Reference), Type of Study (n = 54)               | Institution                                       | Data Collection | Primary HIT Intervention | Setting         | Purpose (To Determine the Effect of . . .)                                                     | Dimensions of Care End Points   | Effect Evaluated                      | Key Finding                                                                                                                                                                                                                                                                                                                                                                                                                                                                                    |
|---------------------------------------------------------------|---------------------------------------------------|-----------------|--------------------------|-----------------|------------------------------------------------------------------------------------------------|---------------------------------|---------------------------------------|------------------------------------------------------------------------------------------------------------------------------------------------------------------------------------------------------------------------------------------------------------------------------------------------------------------------------------------------------------------------------------------------------------------------------------------------------------------------------------------------|
| Bates et al., 1998 (49), time-series study                    | Brigham and Women's Hospital/Partners Health Care | 1993–1995       | CPOE/DS                  | Inpatient       | CPOE on rates of medication errors and preventable ADEs vs. CPOE with addition of team changes | Safety                          | Medication errors                     | 55% relative risk reduction (from 10.7 events/1000 patient-days to 4.9 events/1000 patient-days) in nonintercepted serious medication errors; non-statistically significant 17% relative reduction (from 4.69/1000 patient-days to 3.86/1000 patient-days) in preventable ADEs; decreases seen for all levels of error severity; team changes conferred no additional benefit over CPOE                                                                                                        |
| Mullett et al., 2001 (50), pre–post study                     | LDS Hospital/Intermountain Health Care            | 1998–1999       | DS/EHR                   | Pediatric ICU   | Computerized guidelines on antibiotic appropriateness and use                                  | Effectiveness/efficiency        | Medication errors/adherence           | 32% relative decrease (from 15.8 to 10.8) in number of days that antibiotics were prescribed outside the recommended dosing range; 59% relative decrease in a composite measure of need for pharmacist interventions for incorrect dosing; 6.3–percentage point absolute increase (from 60.2% to 66.5%) in proportion of ICU patients receiving antibiotics; no statistically significant differences in overall antibiotic costs; weighted antibiotic-cost statistic showed decrease in costs |
| Evans et al., 1999 (51), pre–post study                       | LDS Hospital/Intermountain Health Care            | 1993–1996       | DS/EHR                   | Inpatient       | Computerized monitoring of antibiotic doses on appropriateness of dosing and ADE rates         | Safety                          | Medication errors/utilization of care | 0.6–percentage point absolute decrease (from 0.9% to 0.3%) in antibiotic-associated ADEs; 6% relative decrease (from 50% to 40%) in patients receiving excess antibiotic doses for ≥1 d; 12% relative decrease (from 10.1 to 8.9 doses) in number of antibiotic doses prescribed and 13% relative decrease in cost (from \$92.96 to \$80.62); excess dosing was associated with increased ADE rates                                                                                            |
| Evans et al., 1998 (52), cohort study with historical control | LDS Hospital/Intermountain Health Care            | 1992–1995       | DS/EHR                   | Inpatient (ICU) | Computerized alerts on antibiotic use                                                          | Effectiveness/efficiency/safety | Medication errors/adherence           | Compared with the 2-y preintervention period, reductions were seen for the following: antibiotic-associated ADEs (28 vs. 4), mismatches between infection susceptibility and antibiotic (206 vs. 12 episodes), ordered drugs for which a patient had an allergy (146 vs. 35 episodes), days of excess dosing (from 5.9 to 2.7 d), antibiotic costs (from \$340 to \$102), length of stay (from 13 to 10 d), and total hospital costs (from \$35 283 to \$26 315)                               |

Continued on following page

Appendix Table 1—Continued

| Study, Year (Reference), Type of Study (n = 54) | Institution                             | Data Collection | Primary HIT Intervention | Setting              | Purpose (To Determine the Effect of . . .)                                                                                               | Dimensions of Care End Points | Effect Evaluated    | Key Finding                                                                                                                                                                                                                                                                                                                                                                                                                                                                                                     |
|-------------------------------------------------|-----------------------------------------|-----------------|--------------------------|----------------------|------------------------------------------------------------------------------------------------------------------------------------------|-------------------------------|---------------------|-----------------------------------------------------------------------------------------------------------------------------------------------------------------------------------------------------------------------------------------------------------------------------------------------------------------------------------------------------------------------------------------------------------------------------------------------------------------------------------------------------------------|
| White et al., 1984 (53), RCT                    | LDS Hospital/ Intermountain Health Care | NS              | DS                       | Inpatient            | Computer-generated, paper-based alert system on digoxin toxicity                                                                         | Safety                        | Medication errors   | 2.8-fold increase in withholding digoxin on day alert was signaled; 2.7-fold increase in testing of serum digoxin levels in response to alerts; overall, 22% increase in physician actions in response to digoxin-related events (unweighted event rates in study groups not provided)                                                                                                                                                                                                                          |
| <b>Efficiency: utilization of care (n = 11)</b> |                                         |                 |                          |                      |                                                                                                                                          |                               |                     |                                                                                                                                                                                                                                                                                                                                                                                                                                                                                                                 |
| Tierney et al., 1988 (54), RCT                  | Regenstrief                             | 1984–1985       | DS/CPOE                  | Outpatient           | Computer program that generates and displays pretest probabilities for diagnostic tests on utilization of care                           | Efficiency                    | Utilization of care | 8.8% decrease (from \$12.27 to \$11.18) in diagnostic test costs per patient visit; greatest decrease was due to reduced utilization of complete blood counts and electrolytes (the 2 most common tests); mean receiver-operating characteristic curve for computer predictions, 0.80                                                                                                                                                                                                                           |
| Tierney et al., 1987 (55), pre–post study       | Regenstrief                             | NS              | DS/CPOE/EHR              | Outpatient           | Computer program showing previous test results as physicians are ordering new tests vs. usual care (no display of previous test results) | Efficiency                    | Utilization of care | 8.5% decrease (from 0.56 to 0.51) in number of tests ordered per visit; 13% decrease (from \$13.99 to \$12.17) in test costs per visit; program took 4 s to display past results on screen per test                                                                                                                                                                                                                                                                                                             |
| Tierney et al., 1990 (56), RCT                  | Regenstrief                             | 1988            | DS/CPOE/EHR              | Outpatient           | Effect of information on point-of-care test costs on utilization vs. usual care (CPOE without information on test costs)                 | Efficiency                    | Utilization of care | 14.3% decrease (from 1.82 to 1.56) in number of diagnostic tests ordered per visit; 12.9% decrease (from \$51.81 to \$45.13) in diagnostic test costs per visit; effect was greatest for scheduled patient visits                                                                                                                                                                                                                                                                                               |
| Tierney et al., 1993 (57), RCT                  | Regenstrief                             | 1990–1991       | CPOE/EHR                 | Inpatient            | CPOE on costs and utilization of health care                                                                                             | Efficiency                    | Utilization of care | 12.7% reduction (from \$6964 to \$6077) in total costs per admission; statistically significant decreases in hospital bed, medication, and diagnostic test costs; 0.9-d decrease (from 8.5 to 7.6 d) in length of stay; 33-min increase in physician time spent ordering tests                                                                                                                                                                                                                                  |
| Wilson et al., 1982 (58), RCT                   | Regenstrief                             | NS              | EHR                      | Emergency department | Computer-generated, paper-based patient record summaries on utilization of care vs. usual care (no care summaries)                       | Efficiency                    | Utilization of care | Study interrupted by an interval programming error that prevented the previous 4–6 mo of a patient's data from being printed, thus dividing the study into 2 time periods, T1 and T2; 18% decrease (from 3.28 tests/visit to 2.23 tests/visit) in tests ordered for medical visits during T1; 14% decrease (from \$34.91 to \$29.94) in costs; non–statistically significant decrease in tests ordered for surgical visits during T1; no statistically significant difference in utilization or costs during T2 |

Continued on following page

Appendix Table 1—Continued

| Study, Year (Reference), Type of Study (n = 54)    | Institution                                       | Data Collection | Primary HIT Intervention | Setting    | Purpose (To Determine the Effect of . . .)                                                                                                             | Dimensions of Care End Points | Effect Evaluated                      | Key Finding                                                                                                                                                                                                                                                                                                                                                                                                 |
|----------------------------------------------------|---------------------------------------------------|-----------------|--------------------------|------------|--------------------------------------------------------------------------------------------------------------------------------------------------------|-------------------------------|---------------------------------------|-------------------------------------------------------------------------------------------------------------------------------------------------------------------------------------------------------------------------------------------------------------------------------------------------------------------------------------------------------------------------------------------------------------|
| Chen et al., 2003 (59), pre-post study             | Brigham and Women's Hospital/Partners Health Care | 1995–1999       | DS/CPOE                  | Inpatient  | Computerized reminders on rates of inappropriate daily testing of antiepileptic drug levels                                                            | Effectiveness/efficiency      | Utilization of care                   | 27% decrease (53 of 200 total) in redundant laboratory tests of antiepileptic medication levels; effect of reminders stable over 4 y                                                                                                                                                                                                                                                                        |
| Bates et al., 1999 (60), RCT                       | Brigham and Women's Hospital/Partners Health Care | 1994            | DS/CPOE                  | Inpatient  | Computerized reminders on use of laboratory tests, redundant ordering, and associated costs vs. usual care (CPOE without laboratory-related reminders) | Efficiency                    | Utilization of care                   | 24–percentage point absolute reduction (from 51% to 27%) in redundant tests; 31% of reminders were overridden by physicians; 41% of overrides were justified; 56% of redundant tests ordered in intervention group were not ordered via computer; only 51% of redundant tests ordered in control group were actually performed; estimated cost savings, \$35 000/y (0.15% of total laboratory expenditures) |
| Shojania et al., 1998 (61), RCT                    | Brigham and Women's Hospital/Partners Health Care | 1996–1997       | DS/CPOE                  | Inpatient  | Point-of-care computerized guidelines on antibiotic use vs. usual care (CPOE without antibiotic DS)                                                    | Effectiveness                 | Utilization of care                   | 32% relative decrease (from 16.7 orders/physician to 11.3 orders/physician) in antibiotic orders; both initial and renewal order rates decreased                                                                                                                                                                                                                                                            |
| Bates et al., 1997 (71), RCT/time-series study     | Brigham and Women's Hospital/Partners Health Care | 1993–1994       | DS/CPOE                  | Inpatient  | Point-of-care display of test cost information for laboratory and radiology test vs. usual care (CPOE without test cost information)                   | Efficiency                    | Utilization of care                   | No statistically significant differences in number of tests ordered or diagnostic test costs were found; tests did not have to be ordered via the CPOE system; only 53% of laboratory tests and 74% of radiology tests were found to have an associated order in the computer system                                                                                                                        |
| Fihn et al., 1994 (62), RCT                        | VA                                                | NS              | Administrative/DS        | Outpatient | Computerized scheduling system on follow-up time for anticoagulation monitoring vs. usual care                                                         | Safety/access/effectiveness   | Utilization of care/medication errors | Approximate 6-d increase (from 25 to 31 d) in follow-up appointment interval; no statistically significant differences in anticoagulation levels or complication rates                                                                                                                                                                                                                                      |
| Steele et al., 1989 (63), RCT                      | VA                                                | 1987–1988       | Data summary/DS          | Outpatient | Computer-generated, paper-based feedback of medication costs vs. in-person pharmacist counseling on physician prescribing costs                        | Efficiency                    | Utilization of care                   | No statistically significant differences in costs were found with computer-based system vs. pharmacist counseling                                                                                                                                                                                                                                                                                           |
| <b>Efficiency: time (n = 6)</b>                    |                                                   |                 |                          |            |                                                                                                                                                        |                               |                                       |                                                                                                                                                                                                                                                                                                                                                                                                             |
| Overhage et al., 2001 (64), RCT, time-motion study | Regenstrief                                       | 1996–1998       | CPOE/EHR                 | Outpatient | CPOE on physician time utilization                                                                                                                     | Efficiency                    | Time utilization                      | 6.2% increase (from 34.2 to 36.3 min) in physician time per clinic visit; physicians continued to use paper despite CPOE, thereby duplicating tasks; with experience there was a non-statistically significant decrease in physician time of approximately 10% (3.7 min) per clinic visit                                                                                                                   |

Continued on following page

Appendix Table 1—Continued

| Study, Year (Reference), Type of Study (n = 54)           | Institution                                       | Data Collection | Primary HIT Intervention | Setting         | Purpose (To Determine the Effect of . . .)                                                   | Dimensions of Care End Points | Effect Evaluated              | Key Finding                                                                                                                                                                                                                               |
|-----------------------------------------------------------|---------------------------------------------------|-----------------|--------------------------|-----------------|----------------------------------------------------------------------------------------------|-------------------------------|-------------------------------|-------------------------------------------------------------------------------------------------------------------------------------------------------------------------------------------------------------------------------------------|
| Kuperman et al., 1996 (65), cross-sectional analysis      | Brigham and Women's Hospital/Partners Health Care | 1995–1996       | DS                       | Inpatient       | Computerized alerts sent via pager on physician response to serious clinical events          | Safety/ effectiveness         | Time to utilization/ response | Physicians responded to 70% of alerts (1214 of 1730 alerts) and immediately placed orders in response to 39% of answered alerts; physicians responded to 82.5% of answered alerts (1002 of 1214) in < 15 min                              |
| Kuperman et al., 1999 (66), RCT                           | Brigham and Women's Hospital/Partners Health Care | 1994–1995       | DS                       | Inpatient       | Computerized alerts sent via pager on physician response time to critical laboratory results | Safety/ effectiveness         | Time to care/safety           | 38% decrease (from 1.6 to 1.0 h) in median time until treatment ordered; 11% decrease in mean time (from 4.6 to 4.1 h) until treatment; no statistically significant decrease in ADEs                                                     |
| Pizziferri et al., 2005 (67), pre–post, time-motion study | Brigham and Women's Hospital/Partners Health Care | 2001–2003       | EHR                      | Outpatient      | EHR use on physician time utilization in clinic                                              | Efficiency                    | Time utilization              | 0.5-min decrease (from 27.55 to 27.05 min) in clinic visit time; physicians felt EHRs improved quality, access, and communication but negatively affected workload                                                                        |
| Wong et al., 2003 (68), pre–post, time-motion study       | VA                                                | NS              | EHR                      | Inpatient (ICU) | Computerized documentation on nursing time utilization                                       | Efficiency                    | Time utilization              | 10.9–percentage point absolute decrease (from 35.1% to 24.2%) in documentation time; 8.8–percentage point absolute increase (from 31.3% to 40.1%) in time spent on direct patient care                                                    |
| Pierpont and Thilgen, 1995 (69), pre–post study           | VA                                                | NS              | EHR                      | Inpatient (ICU) | Effect of computerized nursing documentation on ICU nurses' time utilization and workflow    | Efficiency                    | Time utilization              | 7–percentage point absolute decrease (from 17% to 10%) in charting time; 3–percentage point decrease (from 7% to 4%) in data-gathering time; 10% of time was spent at computer reviewing data; no change in time spent in patients' rooms |

\* ADE = adverse drug event; CCT = controlled clinical trial; CPOE = computerized provider order entry; DS = decision support; EHR = electronic health record; H<sub>2</sub>-blockers = histamine-2-blockers; HIT = health information technology; ICU = intensive care unit; NS = not specified; RCT = randomized, controlled trial; VA = Department of Veterans Affairs.
