# Supplementary material
Source: HighWire-hosted journal article supplement (https://www.annals.org/content/suppl/2006/05/30/144.10.742)
Supplement: Chaudhry_AT2_144-10-742-DC1-1.pdf [file Chaudhry_AT2_144-10-742-DC1-1.pdf]

Appendix Table 2. Other Institutions Researching Health Information Technology\*

| Study, Year (Reference), Type of Study (n = 22)            | Data Collection | Primary HIT Intervention              | Setting    | Purpose (To Determine the Effect of . . .)                                                                                                                                                                                                                                                                                           | Dimensions of Care End Points | Effect Evaluated    | Type of Institution | Key Findings                                                                                                                                                                                                                                                                                                                                                                                                                                                                                                                                      |
|------------------------------------------------------------|-----------------|---------------------------------------|------------|--------------------------------------------------------------------------------------------------------------------------------------------------------------------------------------------------------------------------------------------------------------------------------------------------------------------------------------|-------------------------------|---------------------|---------------------|---------------------------------------------------------------------------------------------------------------------------------------------------------------------------------------------------------------------------------------------------------------------------------------------------------------------------------------------------------------------------------------------------------------------------------------------------------------------------------------------------------------------------------------------------|
| <b>Commercially developed systems</b>                      |                 |                                       |            |                                                                                                                                                                                                                                                                                                                                      |                               |                     |                     |                                                                                                                                                                                                                                                                                                                                                                                                                                                                                                                                                   |
| <b>Adherence</b>                                           |                 |                                       |            |                                                                                                                                                                                                                                                                                                                                      |                               |                     |                     |                                                                                                                                                                                                                                                                                                                                                                                                                                                                                                                                                   |
| Rollman et al., 2002 (87), RCT                             | 1997–1998       | DS/EHR (Logician, MedicalLogic Corp.) | Outpatient | Three interventions on screening for mood disorders and physician agreement with computer-generated diagnosis: 1) computer-generated, paper-based reminders for depression with treatment recommendations; 2) computer-generated, paper-based reminders with diagnosis information; on quality of depression care, and 3) usual care | Effectiveness                 | Adherence           | Academic            | No statistically significant difference in depression symptom scores or delivery of recommended processes of depression care for either intervention group when compared with usual care                                                                                                                                                                                                                                                                                                                                                          |
| <b>Utilization of care</b>                                 |                 |                                       |            |                                                                                                                                                                                                                                                                                                                                      |                               |                     |                     |                                                                                                                                                                                                                                                                                                                                                                                                                                                                                                                                                   |
| Garrido et al., 2005 (84), retrospective time-series study | 2000–2004       | EHR (EpiCare, Epic Systems Corp.)     | Outpatient | EHR on adherence to recommended care and efficiency measures                                                                                                                                                                                                                                                                         | Effectiveness                 | Adherence           | Kaiser Permanente   | No statistically significant difference in depression symptom scores or delivery of recommended processes of depression care for either intervention group when compared with usual care                                                                                                                                                                                                                                                                                                                                                          |
| Chin and Wallace, 1999 (83), time-series study             | 1994–1997       | EHR/DS (EpiCare, Epic Systems Corp.)  | Outpatient | EHR with CPOE and DS on adherence to guideline-based care for radiology services and medication use                                                                                                                                                                                                                                  | Quality/effectiveness         | Utilization of care | Kaiser Permanente   | 48% relative decrease (from 10.6 tests/1000 to 5.6 tests/1000) for upper gastrointestinal tract radiology studies by year 4 after EHR implementation, with a 33–percentage point absolute increase (from 55% to 88%) in adherence to protocols for test ordering; 20% decrease in chest radiographs ordered (years after implementation and information on relative or absolute decrease not provided); 2.3–percentage point absolute decrease (from 4.7% to 2.4%) in prescribing of a nonformulary antidepressant by year 2 after implementation |

Continued on following page

Appendix Table 2—Continued

| Study, Year (Reference), Type of Study (n = 22)                              | Data Collection | Primary HIT Intervention              | Setting       | Purpose (To Determine the Effect of . . .)                                                                                                                                                                                                      | Dimensions of Care End Points | Effect Evaluated                   | Type of Institution | Key Findings                                                                                                                                                                                                                                                                                                                                                                                                                                                                           |
|------------------------------------------------------------------------------|-----------------|---------------------------------------|---------------|-------------------------------------------------------------------------------------------------------------------------------------------------------------------------------------------------------------------------------------------------|-------------------------------|------------------------------------|---------------------|----------------------------------------------------------------------------------------------------------------------------------------------------------------------------------------------------------------------------------------------------------------------------------------------------------------------------------------------------------------------------------------------------------------------------------------------------------------------------------------|
| <b>Surveillance</b>                                                          |                 |                                       |               |                                                                                                                                                                                                                                                 |                               |                                    |                     |                                                                                                                                                                                                                                                                                                                                                                                                                                                                                        |
| Rollman et al., 2001 (86), RCT                                               | 1997–1999       | DS/EHR (Logician, MedicalLogic Corp.) | Outpatient    | Three interventions on quality of depression care: 1) computer-generated, paper-based reminders for depression with treatment recommendations; 2) computer-generated, paper-based reminders with diagnosis information alone; and 3) usual care | Effectiveness                 | Surveillance                       | Academic            | Three days after computer notification of possible mood disorder, 65% of physicians agreed with computer-screened diagnosis, 13% disagreed, and 23% were uncertain; no differences in treatment provided across guideline-exposure condition                                                                                                                                                                                                                                           |
| <b>Time utilization/medication errors</b>                                    |                 |                                       |               |                                                                                                                                                                                                                                                 |                               |                                    |                     |                                                                                                                                                                                                                                                                                                                                                                                                                                                                                        |
| Koppel et al., 2005 (91), mixed quantitative/qualitative descriptive methods | 2002–2004       | CPOE (Eclipsys Corp.)                 | Inpatient     | CPOE in facilitating medication prescribing errors                                                                                                                                                                                              | Safety                        | Medication errors                  | Academic            | CPOE facilitated 22 types of medication error risks; errors were classified as being due to 1) fragmentation of data and failure to integrate CPOE systems with other hospital systems and 2) flaws in human–machine interface                                                                                                                                                                                                                                                         |
| Mekhjjan et al. (88), 2002, pre–post study                                   | 2000            | CPOE/DS (Invision24, Siemens Corp.)   | Inpatient/ICU | CPOE with electronic records for medication administration on care delivery time, workflow process, and costs                                                                                                                                   | Efficiency                    | Time utilization/medication errors | Academic            | 64% relative decrease (from 328 to 111 min) in medication turnaround time; 43% relative decrease (from 457 to 261 min) in completion time for radiology procedures; 25% relative decrease (from 31.3 to 23.4 min) in reporting time for laboratory results; 11.3–percentage point absolute decrease (from 11.3% to 0%) in transcription errors; 5% relative decrease (from 3.91 to 3.71 d) in severity-adjusted length of stay; no statistically significant decreases in overall cost |

Appendix Table 2—Continued

| Study, Year (Reference), Type of Study (n = 22)                     | Data Collection | Primary HIT Intervention                                              | Setting      | Purpose (To Determine the Effect of . . .)                                                                     | Dimensions of Care End Points | Effect Evaluated                   | Type of Institution | Key Findings                                                                                                                                                                                                                                                                                                                                                                                                                                                                                                      |
|---------------------------------------------------------------------|-----------------|-----------------------------------------------------------------------|--------------|----------------------------------------------------------------------------------------------------------------|-------------------------------|------------------------------------|---------------------|-------------------------------------------------------------------------------------------------------------------------------------------------------------------------------------------------------------------------------------------------------------------------------------------------------------------------------------------------------------------------------------------------------------------------------------------------------------------------------------------------------------------|
| Cordero et al., 2004 (89), pre-post study with retrospective review | 2002            | CPOE/DS (Invision24, Siemens Corp.)                                   | Neonatal ICU | CPOE with DS on medication errors and care delivery time in neonatal ICU                                       | Safety/efficiency             | Medication errors/time utilization | Academic            | 13–percentage point absolute decrease (from 13% to 0%) in medication dosing errors; 73% relative decrease (from 10.5 to 2.8 h) in turnaround time for 1 medication (caffeine); 24% relative decrease (from 42 to 32 min) in radiology response time; physician and staff training started 4 wk before CPOE implementation; nurse leaders received 16 h of training, nurses and clerical staff received 8 h, and physicians received 2–4 h; during implementation, information systems staff provided 24-h support |
| Kilgore et al., 1998 (90), pre-post study                           | 1995–1996       | EHR (CareVue 9000, Hewlett-Packard Corp.; PIN System, Eclipsys Corp.) | ICU          | Two different nursing ICU information systems with CPOE and results reporting on nurse work patterns and costs | Efficiency                    | Time utilization                   | Academic            | Effect of computer systems on nurse charting time was inconclusive per authors because ICU patient census varied; staff satisfaction was higher with CareVue 9000 than with PIN System because of interface ease and greater support of workflow; expected net annual savings from preferred system were estimated at \$320 359                                                                                                                                                                                   |
| <b>Implementation costs</b>                                         |                 |                                                                       |              |                                                                                                                |                               |                                    |                     |                                                                                                                                                                                                                                                                                                                                                                                                                                                                                                                   |
| Krall, 1995 (85), descriptive quantitative study                    | 1994            | EHR (EpiCare, Epic Systems Corp.)                                     | Outpatient   | EHR use on workflow and attitudes                                                                              | Efficiency                    | Implementation cost                | Kaiser Permanente   | Physicians took 30 d to return to baseline productivity levels (patient visits/d); 2-min increase in physician time per visit; physician satisfaction with system increased over time                                                                                                                                                                                                                                                                                                                             |
| <b>Internally developed systems</b>                                 |                 |                                                                       |              |                                                                                                                |                               |                                    |                     |                                                                                                                                                                                                                                                                                                                                                                                                                                                                                                                   |
| <b>Adherence</b>                                                    |                 |                                                                       |              |                                                                                                                |                               |                                    |                     |                                                                                                                                                                                                                                                                                                                                                                                                                                                                                                                   |
| Khoury, 1998 (70), time-series study                                | 1993–1997       | EHR/DS                                                                | Outpatient   | EHR with DS on adherence to guideline-based care                                                               | Effectiveness/efficiency      | Adherence                          | Kaiser Permanente   | Adherence to guidelines improved for 6 conditions; levels of improvement ranged from 4– to 52–percentage point absolute increases in process of care delivery; estimated annual savings, \$2 470 000 (cost of system development not included)                                                                                                                                                                                                                                                                    |

Continued on following page

Appendix Table 2—Continued

| Study, Year (Reference), Type of Study (n = 22) | Data Collection | Primary HIT Intervention | Setting              | Purpose (To Determine the Effect of . . .)                                                                                                                                | Dimensions of Care End Points | Effect Evaluated | Type of Institution | Key Findings                                                                                                                                                                                                                                                                                                                                                                                                                                                                                                                                                                                            |
|-------------------------------------------------|-----------------|--------------------------|----------------------|---------------------------------------------------------------------------------------------------------------------------------------------------------------------------|-------------------------------|------------------|---------------------|---------------------------------------------------------------------------------------------------------------------------------------------------------------------------------------------------------------------------------------------------------------------------------------------------------------------------------------------------------------------------------------------------------------------------------------------------------------------------------------------------------------------------------------------------------------------------------------------------------|
| Ornstein et al., 1995 (72), pre-post study      | NS              | EHR/DS                   | Outpatient           | EHR with computerized reminders on delivery of preventive care                                                                                                            | Effectiveness                 | Adherence        | Academic            | 7 of 7 counseling measures improved: absolute increase in adherence ranging from 13 to 16 percentage points; 10 of 15 screening processes improved: absolute increase approximately ranging from 3 to 20 percentage points                                                                                                                                                                                                                                                                                                                                                                              |
| Garr et al., 1993 (71), pre-post study          | 1989–1990       | DS/EHR                   | Outpatient           | EHR with computerized reminders on delivery of preventive care                                                                                                            | Effectiveness                 | Adherence        | Academic            | Absolute increases in delivery of preventive care, 1–8 percentage points; all 5 services included                                                                                                                                                                                                                                                                                                                                                                                                                                                                                                       |
| Safran et al., 1995 (75), CCT                   | 1992–1993       | EHR/DS                   | Outpatient           | Computerized reminders and alerts on delivery of HIV care                                                                                                                 | Effectiveness                 | Adherence        | Academic            | Approximate 22–percentage point absolute increase (from 46% to 68%) in adherence to recommended process of care at 1 y after occurrence of clinical event warranting reminder; 29–percentage point absolute increase (from 38% to 67%) in physician responses 1 mo after clinical event warranting alert                                                                                                                                                                                                                                                                                                |
| Schriger et al., 1997 (73), CCT                 | 1992–1995       | DS/EHR                   | Emergency department | Computerized guidelines embedded in computerized charting system designed to track 5 conditions on processes of care for exposure of health care workers to bodily fluids | Effectiveness/efficiency      | Adherence        | Academic            | 12–percentage point absolute increase (from 83% to 96%) in adherence to 5 treatment guidelines; 20–percentage point absolute increase (from 63% to 83%) in adherence to 4 guidelines on laboratory test use; 62–percentage point absolute increase (from 31% to 93%) in documented adherence to aftercare guidelines; 42–percentage point absolute increase (from 57% to 98%) in adherence to guidelines for documentation of patient history; all measures decreased toward baseline rates when computer system was turned off; 23% relative decrease (from \$520 to \$401) in total per-patient costs |

Continued on following page

Appendix Table 2—Continued

| Study, Year (Reference), Type of Study (n = 22) | Data Collection | Primary HIT Intervention  | Setting              | Purpose (To Determine the Effect of . . .)                                                                                                                                                             | Dimensions of Care End Points | Effect Evaluated    | Type of Institution                                   | Key Findings                                                                                                                                                                                                                                                                                                                                                                                                                                                                                                                  |
|-------------------------------------------------|-----------------|---------------------------|----------------------|--------------------------------------------------------------------------------------------------------------------------------------------------------------------------------------------------------|-------------------------------|---------------------|-------------------------------------------------------|-------------------------------------------------------------------------------------------------------------------------------------------------------------------------------------------------------------------------------------------------------------------------------------------------------------------------------------------------------------------------------------------------------------------------------------------------------------------------------------------------------------------------------|
| Schriger et al., 2000 (74), CCT                 | 1992–1995       | DS/EHR                    | Emergency department | Computerized guidelines embedded in computerized charting system designed to track 5 conditions on processes of care for evaluation of febrile children < age 3 y presenting to emergency department   | Effectiveness/efficiency      | Adherence           | Academic                                              | Per authors' report, 13–percentage point absolute increase (from 80% to 92%) in documented adherence to guidelines for medical history and physical examination; 33–percentage point absolute increase (from 48% to 81%) in documented adherence to guidelines for aftercare instruction; all rates returned to baseline when computer system was turned off; no statistically significant differences in appropriateness of treatment, appropriateness or utilization rates of diagnostic tests, or test charges per patient |
| Day et al., 1995 (76), pre–post study           | 1992–1993       | DS/EHR                    | Emergency department | Computerized guidelines embedded in computerized charting system designed to track 5 conditions on processes of care for lower back pain                                                               | Effectiveness/efficiency      | Adherence           | Academic                                              | No statistically significant differences in appropriateness of diagnostic testing or treatment; no statistically significant decrease in costs; 12– to 51–percentage point absolute increase in documentation of 6 medical history items; 13– to 70–percentage point absolute increase in documentation of 6 aftercare counseling items                                                                                                                                                                                       |
| Simon et al., 2000 (77), RCT                    | NS              | EHR/data summary/DS       | Outpatient           | Three interventions: 1) feedback to physicians of computerized data summaries with treatment recommendations for depression care, 2) computerized feedback plus telephone follow-up, and 3) usual care | Effectiveness/efficiency      | Adherence           | Nonacademic (Group Health Cooperative of Puget Sound) | No statistically significant difference in computerized DS group compared with usual care; 15% relative improvement (from 0.83 vs. 0.98) in depression scores in computerized DS with telephone follow-up group, with associated increase in likelihood of receiving antidepressant therapy; \$80 increase in costs in telephone follow-up group                                                                                                                                                                              |
| <b>Utilization of care</b>                      |                 |                           |                      |                                                                                                                                                                                                        |                               |                     |                                                       |                                                                                                                                                                                                                                                                                                                                                                                                                                                                                                                               |
| Baird et al., 1984 (78), RCT                    | NS              | DS/electronic prescribing | Outpatient           | Computer-generated, paper-based pharmacy reminders from hospital mainframe-based information system on prescription refill rates                                                                       | Access                        | Utilization of care | Academic                                              | No statistically significant difference in refill rates; initial development of software program, \$200; cost per day to generate reminders, \$14                                                                                                                                                                                                                                                                                                                                                                             |

Continued on following page

Appendix Table 2—Continued

| Study, Year (Reference), Type of Study (n = 22) | Data Collection | Primary HIT Intervention | Setting    | Purpose (To Determine the Effect of . . .)                                                                                                                     | Dimensions of Care End Points | Effect Evaluated       | Type of Institution | Key Findings                                                                                                                                                                                                                                                                                                                                                       |
|-------------------------------------------------|-----------------|--------------------------|------------|----------------------------------------------------------------------------------------------------------------------------------------------------------------|-------------------------------|------------------------|---------------------|--------------------------------------------------------------------------------------------------------------------------------------------------------------------------------------------------------------------------------------------------------------------------------------------------------------------------------------------------------------------|
| Sanders and Miller, 2001 (79), pre-post study   | 2000–2001       | DS/CPOE                  | Inpatient  | Computerized guidelines integrated into a CPOE system on utilization of CT and MRI                                                                             | Efficiency                    | Utilization of care    | Academic            | 5% relative decrease in neuroradiology CT and MRI diagnostic testing; 40% of users receiving computerized guideline ordered a nonrecommended test                                                                                                                                                                                                                  |
| <b>Surveillance</b>                             |                 |                          |            |                                                                                                                                                                |                               |                        |                     |                                                                                                                                                                                                                                                                                                                                                                    |
| Wells et al., 2003 (81), pre-post study         | 2001–2002       | DS/EHR                   | Outpatient | EHR on identifying patients taking 2 drugs for which a combination pill is available and then generating computerized reminders to promote combination therapy | Effectiveness                 | Surveillance/adherence | Academic            | 27% of patients eligible were switched to combination therapy; cost savings related to combined therapy totaled \$6159 per year; 241 patients were screened as eligible for combination therapy; total number of unique patients seen during study not given                                                                                                       |
| <b>Medication errors</b>                        |                 |                          |            |                                                                                                                                                                |                               |                        |                     |                                                                                                                                                                                                                                                                                                                                                                    |
| Potts et al., 2004 (80), pre-post study         | 2001–2002       | CPOE/DS                  | ICU        | CPOE with DS on medication errors in pediatric ICU                                                                                                             | Efficiency                    | Medication errors      | Academic            | 41% relative decrease (from 2.2 errors/100 orders to 1.3 errors/100 orders) in medication errors categorized as potential adverse drug events; 96% relative decrease (from 30 errors/100 orders to 0.2 error/100 orders) in medication prescribing orders; decreases occurred in all categories of medication errors                                               |
| <b>Implementation cost</b>                      |                 |                          |            |                                                                                                                                                                |                               |                        |                     |                                                                                                                                                                                                                                                                                                                                                                    |
| Khoury, 1997 (82), time-series study            | 1989–NS         | EHR                      | Outpatient | Long-term costs and benefits of implemented EHR                                                                                                                | Efficiency                    | Implementation cost    | Kaiser Permanente   | Cost of development estimated at \$10 million; project took 8 y from beginning of development to full implementation; total ongoing annual expenses estimated to be \$1.1 million per year; expected savings per year estimated as \$3.7 million, with greatest savings from reduction in medical record room staff; system predicted to pay for itself in year 13 |

\* City and state locations of manufacturers are as follows: MedicaLogic Corp., Beaverton, Oregon; Epic Systems Corp., Verona, Wisconsin; Eclipsys Corp., Boca Raton, Florida; Siemens Corp., New York, New York; Hewlett-Packard Corp., Palo Alto, California. CCT = controlled clinical trial; CPOE = computerized provider order entry; CT = computed tomography; DS = decision support; EHR = electronic health record; HIT = health information technology; ICU = intensive care unit; MRI = magnetic resonance imaging; NS = not specified; RCT = randomized, controlled trial.
